# Supplementary material for: Dual epigenetic changes in diabetes mellitus‐associated pancreatic ductal adenocarcinoma correlate with downregulation of E‐cadherin and worsened prognosis
Source: PubMed Central journal article supplement — J Pathol Clin Res. 2023 May 28;9(5):354–66. doi: 10.1002/cjp2.326 (PMC10397378; doi:10.1002/cjp2.326), 2023-05-28
Supplement: CJP2-9-354-s001.pdf [file CJP2-9-354-s001.pdf]

# Dual epigenetic changes in diabetes mellitus-associated pancreatic ductal adenocarcinoma correlate with downregulation of E-cadherin and worsened prognosis

Yutaro Hara *et al*, *J Pathol Clin Res*, <https://doi.org/10.1002/cjp2.326>

Supplementary Figure S1  
Supplementary Tables S1 – S3

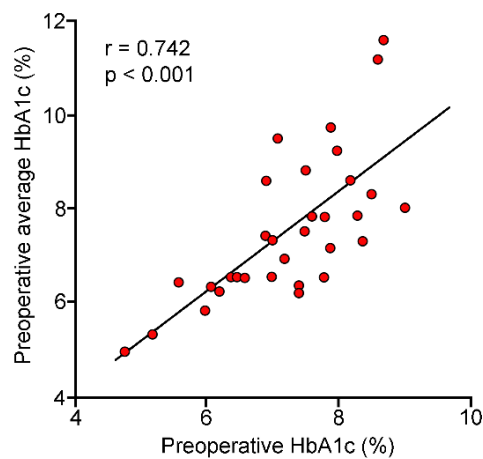

**Figure S1.** Preoperative HbA1c levels (within 1 month) showed a significant proportional correlation with average HbA1c levels 3-12 months before surgery in PDAC subjects ( $r = 0.742$ ,  $p < 0.001$ ). PDAC, pancreatic ductal adenocarcinoma.

**Table S1. Clinicopathological characteristics of 132 subjects**

|                                       | Control            | DM                 | p-value |
|---------------------------------------|--------------------|--------------------|---------|
| Number (male:female)                  | 67 (28:39)         | 65 (36:29)         | 0.216   |
| Age (year)*                           | 70 (66 – 75)       | 70 (66 – 75)       | 0.868   |
| Smoker                                | 50.8% (34/67)      | 53.9% (35/65)      | 0.778   |
| Body mass index (kg/m <sup>2</sup> )* | 21.8 (19.7 – 24.0) | 23.5 (21.1 – 26.1) | < 0.01  |
| Diabetes duration (years)             | N.A.               | 3.0 (0 – 10)       | -       |
| Long-DM                               | N.A.               | 52.3% (34/65)      | -       |
| Diabetes therapy                      |                    |                    |         |
| Diet only                             | N.A.               | 36.9% (24/65)      | -       |
| DPP4 inhibitor                        | N.A.               | 52.3% (34/65)      | -       |
| Metformin                             | N.A.               | 12.3% (8/65)       | -       |
| Insulin                               | N.A.               | 16.9% (11/65)      | -       |
| HbA1c (NGSP, %) (pre-operation)*      | 5.6 (5.3 – 6.0)    | 7.2 (6.5 – 7.9)    | < 0.01  |
| Tumor size (mm)*                      | 30.0 (22.5 – 39.0) | 30.0 (25.0 – 40.0) | 0.388   |
| T stage:                              |                    |                    |         |
| T1-T2                                 | 68.7% (46/67)      | 63.1% (41/65)      |         |
| T3-T4                                 | 31.3% (21/67)      | 36.9% (24/65)      | 0.456   |
| N stage:                              |                    |                    |         |
| N0                                    | 46.3% (31/67)      | 43.1% (28/65)      |         |
| N1                                    | 53.7% (36/67)      | 56.9% (37/65)      | 0.776   |
| Histological grade:                   |                    |                    |         |
| Well-mod                              | 77.6% (52/67)      | 69.2% (45/65)      |         |
| Poor                                  | 22.4% (15/67)      | 30.8% (20/65)      | 0.200   |
| ly-factor                             |                    |                    |         |
| 0-1                                   | 26.9% (18/67)      | 35.4% (23/65)      |         |
| 2-3                                   | 73.1% (49/67)      | 66.2% (43/65)      | 0.286   |
| v-factor                              |                    |                    |         |
| 0-1                                   | 22.4% (15/67)      | 20.0% (13/65)      |         |
| 2-3                                   | 77.6% (52/67)      | 80.0% (52/65)      | 0.862   |
| ne-factor                             |                    |                    |         |
| 0-1                                   | 10.5% (7/67)       | 7.7% (5/65)        |         |
| 2-3                                   | 89.6% (60/67)      | 92.3% (60/65)      | 0.806   |

Table S1 Continued

|                             |                   |                 |         |
|-----------------------------|-------------------|-----------------|---------|
| INF type                    |                   |                 |         |
| a-b                         | 23.9% (16/67)     | 23.1% (15/65)   |         |
| c                           | 76.1% (51/67)     | 76.9% (50/65)   | > 0.999 |
| Location                    |                   |                 |         |
| Ph                          | 74.6% (50/67)     | 53.9% (35/65)   |         |
| Pb-t                        | 25.4% (17/67)     | 38.5% (25/65)   |         |
| Phbt                        | 0                 | 7.7% (5/65)     | < 0.01  |
| Type of resection           |                   |                 |         |
| Pancreatico-duodenectomy    | 71.6% (48/67)     | 50.8% (33/65)   |         |
| Distal pancreatectomy       | 25.4% (17/67)     | 38.5% (25/65)   |         |
| Total pancreatectomy        | 3.0% (2/67)       | 10.8% (7/65)    | < 0.05  |
| Curative resection          |                   |                 |         |
| R0                          | 92.5% (62/67)     | 93.9% (61/65)   |         |
| R1-2                        | 7.5% (5/67)       | 6.2% (4/65)     | > 0.999 |
| Neo-adjuvant chemotherapy   | 6.0% (4/67)       | 13.9% (9/65)    | 0.097   |
| Post-operative chemotherapy | 86.6% (58/67)     | 80.0% (52/65)   | 0.253   |
| Resectability               |                   |                 |         |
| Resectable                  | 85.1% (57/67)     | 81.5% (53/65)   |         |
| Borderline resectable       | 14.9% (10/67)     | 18.5% (12/65)   | 0.704   |
| CA19-9 (U/mL)               | 67.0 (11.5 – 220) | 72.0 (25 – 322) | 0.497   |

DM, diabetes mellitus; long-DM, long duration of DM; N.A., not applicable; DPP4, dipeptidyl peptidase4; well, well differentiated adenocarcinoma; mod, moderately differentiated adenocarcinoma; poor, poorly differentiated adenocarcinoma. \*Values are expressed as median (range).

**Table S2. Univariate analysis (Disease Free Survival)**

| Factor                                       | Median DFS (date) | p-value |
|----------------------------------------------|-------------------|---------|
| Age (years): < 65 vs $\geq$ 65               | 418 vs 428        | 0.737   |
| Male vs Female                               | 369 vs 461        | 0.200   |
| Location: Body-Tail vs Head                  | 441 vs 407        | 0.306   |
| Tumor size (mm): < 30 vs $\geq$ 30           | 460 vs 287        | < 0.05  |
| T1-2 vs T3-4                                 | 433vs 365         | 0.306   |
| N: N0 vs N1                                  | 632 vs 365        | < 0.001 |
| CA19-9 (U/mL): < 200 vs $\geq$ 200           | 464 vs 282        | < 0.01  |
| Adjuvant chemotherapy: (-) vs (+)            | 244 vs 441        | < 0.001 |
| HbA1c (%): $\geq$ 6.5 vs < 6.5               | 342 vs 441        | < 0.05  |
| DM: (+) vs (-)                               | 365 vs 460        | 0.09    |
| Long-DM: (+) vs (-)                          | 341 vs 437        | 0.152   |
| miR-100-5p expression: < 4.13 vs $\geq$ 4.13 | 460 vs 365        | < 0.05  |
| <i>CDH1</i> promoter methylation: (-) vs (+) | 461 vs 352        | < 0.01  |

DFS, disease free survival; DM, diabetes mellitus; long-DM, long duration of DM.

**Table S3. Multivariate analysis (Disease Free Survival)**

| Factor                                | Risk ratio | 95%CI       | p-value |
|---------------------------------------|------------|-------------|---------|
| Tumor size (mm): $\geq 30$            | 1.58       | 1.03 – 2.43 | < 0.05  |
| N: N1                                 | 1.52       | 0.98 – 2.36 | 0.06    |
| CA19-9 (U/mL): $\geq 200$             | 1.58       | 1.02 – 2.45 | < 0.05  |
| Adjuvant chemotherapy: (+)            | 0.41       | 0.25 – 0.69 | <0.01   |
| miR-100-5p expression: $\geq 4.13$    | 1.54       | 1.01 – 2.35 | < 0.05  |
| <i>CDH1</i> promoter methylation: (+) | 1.71       | 1.13 – 2.58 | < 0.05  |

CI, confidence interval
